# Supplementary material
Source: PubMed Central journal article supplement (PMC4207475)
Supplement: cdd201426x1.pdf [file cdd201426x1.pdf]

## Supplementary Information

### **G0/G1 switch gene 2 plays a critical role in adipocyte differentiation**

Hyeonjin Choi<sup>1,2</sup>, Hyemin Lee<sup>1,3</sup>, Tae-Hyun Kim<sup>1</sup>, Hyo Jung Kim<sup>1</sup>, Yoo Jeong Lee<sup>1</sup>, Soo Jin Lee<sup>1</sup>, Jung Hwan Yu<sup>1,2</sup>, Daham Kim<sup>1,2</sup>, Kyung-Sup Kim<sup>1,2</sup>, Sahng Wook Park<sup>1,2†</sup>, Jae-woo Kim<sup>1,2,3†</sup>

<sup>1</sup>Department of Biochemistry and Molecular Biology, Integrated Genomic Research Center for Metabolic Regulation, Institute of Genetic Science, Yonsei University College of Medicine, Seoul 120-752, Korea

<sup>2</sup>Brain Korea 21 PLUS Project for Medical Science, Yonsei University, Seoul 120-752, Korea

<sup>3</sup>Department of Integrated OMICS for Biomedical Sciences, WCU Program of Graduate School, Yonsei University, Seoul 120-749, Korea

## Supplementary Figure S1

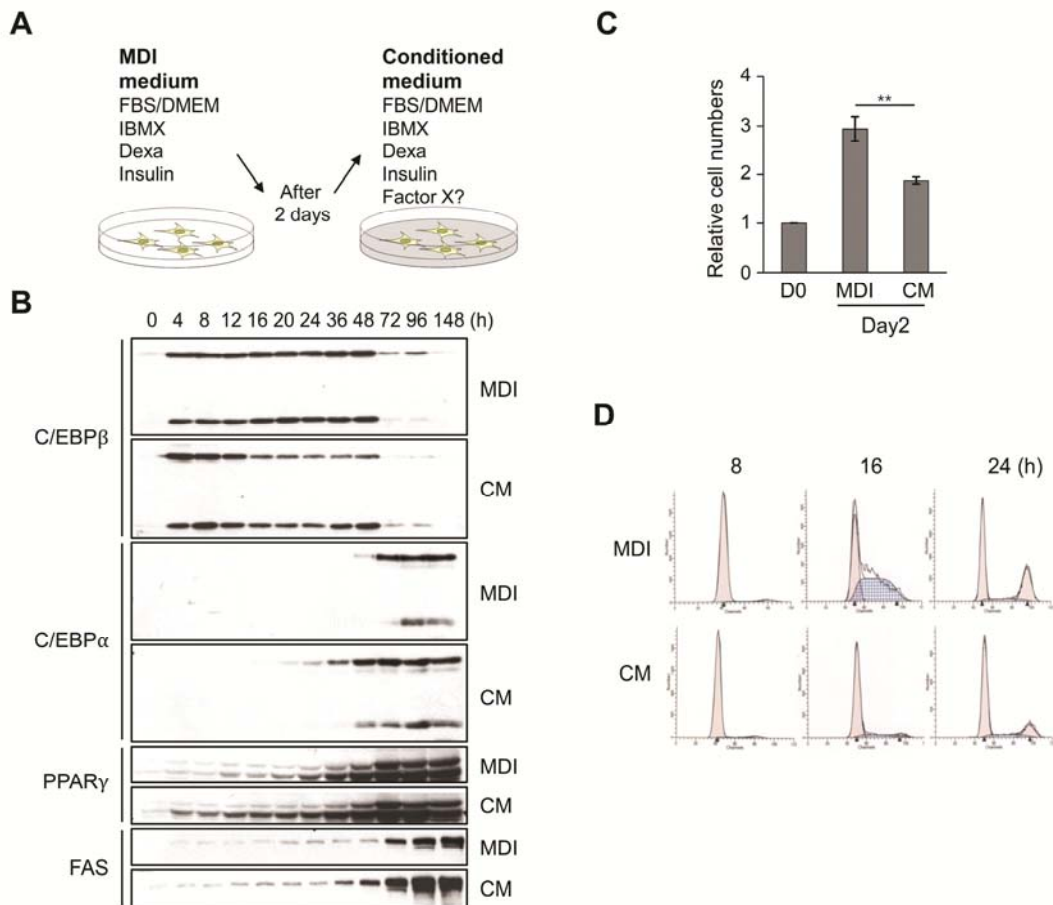

**Supplementary Figure S1.** Effect of conditioned medium on the 3T3-L1 differentiation. **(A)** Design of collecting conditioned medium using a preadipocyte differentiation system. 3T3-L1 preadipocytes were induced to differentiate into adipocytes with a mixture of hormonal agents (MDI medium), and after 2 days, cell-exposed medium was collected and designated as conditioned medium (CM). **(B)** 3T3-L1 cells were differentiated either in MDI or CM and then cell lysates were prepared at various times after adipogenic induction, subjected to SDS-PAGE and transfer to immunoblots, and these were hybridized with antibody against C/EBP $\beta$ , C/EBP $\alpha$ , PPAR $\gamma$ , or FAS. **(C)** Cell counts at day 2 after induction. Cells were induced with MDI or CM, and they were counted at day 2. **(D)** FACS analysis of DNA content of 3T3-L1 preadipocytes induced with MDI or CM. After induction, cells were harvested at 8, 16, or 24 h for FACS analysis using a FACS Calibur flow cytometry system. The data were analyzed by ModFit software.

## Supplementary Figure S2

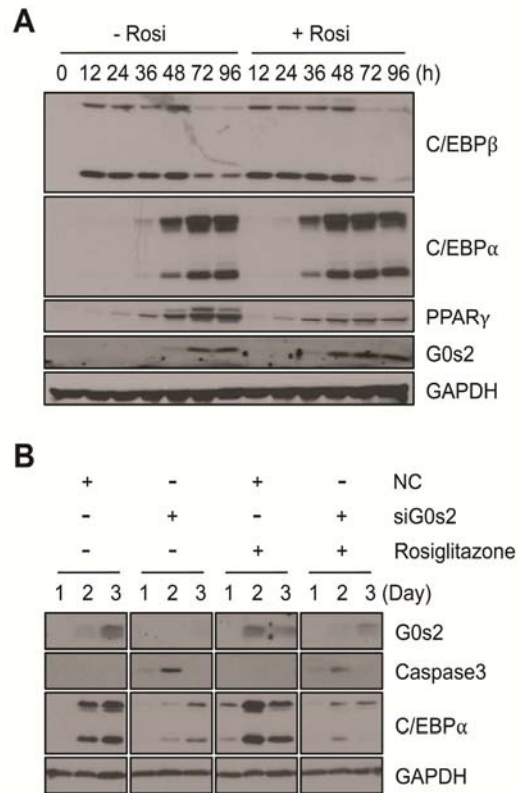

**Supplementary Figure S2.** Rosiglitazone enhances G0s2 expression and promotes fat accumulation. **(A)** 3T3-L1 cells were harvested at the indicated times after treatment with rosiglitazone, and western blot analysis of C/EBPβ, C/EBPα, PPARγ, and G0s2 expression was carried out, with GAPDH as loading control. **(B)** Western blot analysis showing expression of G0s2, caspase 3, C/EBPα, and GAPDH in 3T3-L1 cells transfected with negative control or G0s2 siRNA, in the presence or absence of 2 μM rosiglitazone.

## Supplementary Figure S3

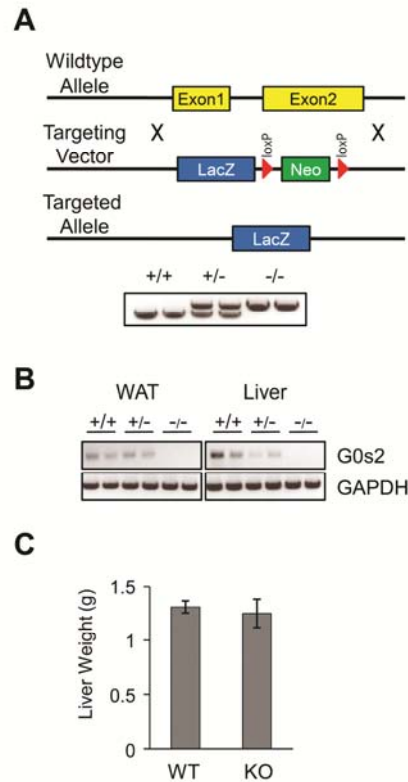

**Supplementary Figure S3.** Generation and characterization of G0s2-knockout mice. **(A)** The G0s2 gene was replaced with a LacZ-neo cassette by homologous recombination. Genotyping of mice was performed on genomic DNA by PCR. Expected band sizes for G0s2 during gel analysis were 526 bp for the wild-type and 610 bp for the knockout allele. Results shown for G0s2 wild-type (+/+), heterozygote (+/-), or homozygote (-/-). **(B)** RT-PCR analysis of genes of white adipose tissue and liver from control and G0s2-knockout mice. **(C)** Liver weight was evaluated in G0s2-knockout and wild-type control mice at the age of 12 weeks.

## Supplementary Figure S4

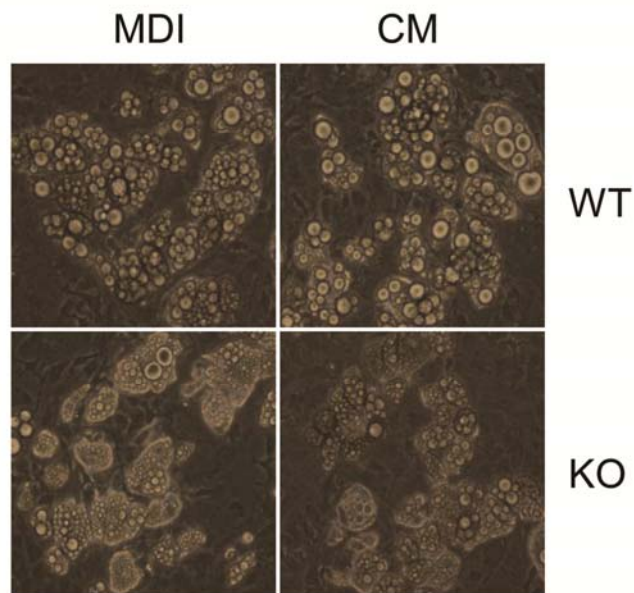

**Supplementary Figure S4.** CM did not affect the differentiation pattern in G0s2-knockout mouse embryo fibroblast (MEF) cells. MEFs from wild-type (WT) or G0s2-knockout (KO) mice were induced for adipocyte differentiation, either by MDI or CM supplemented with rosiglitazone, and microscopy was done at day 12.

## Supplementary Figure S5

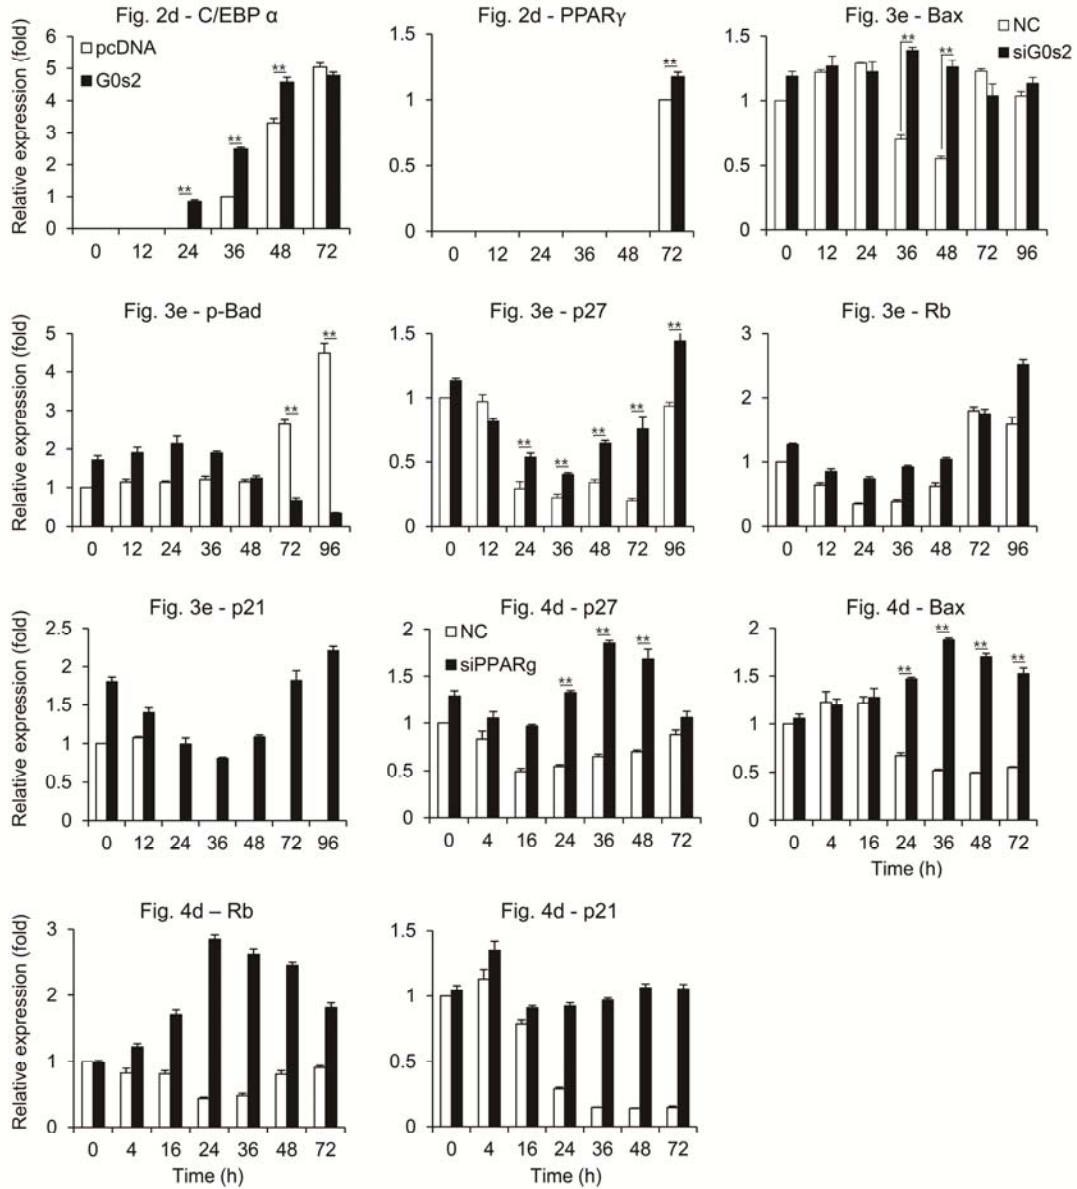

**Supplementary Figure S5.** Quantification analysis of the western blot data. Western blot results were analyzed to quantify signal intensities using ImageJ after normalization to GAPDH levels.

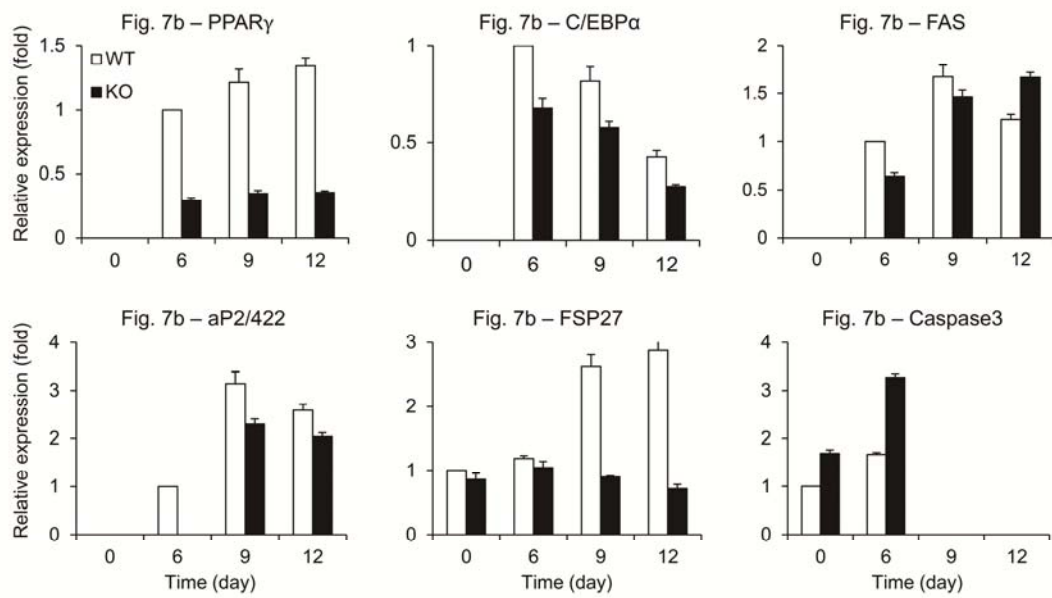

**Supplementary Figure S5.** Continued

## Supplementary Table S1

**Supplementary Table S1.** Sequences of oligonucleotide primers used for quantitative real-time PCR (qPCR)

| Oligonucleotide |           | Sequence (5'→3')        |
|-----------------|-----------|-------------------------|
| Gas1            | Sense     | GAATCGGTCAAAGAGAACAT    |
|                 | Antisense | GTCGTCATATTCTTCGTCGT    |
| Gas2            | Sense     | CACTGAAGAGAGTTCCTTGC    |
|                 | Antisense | TTCATCAACTCCCAAATCTC    |
| Gas5            | Sense     | ATGAAGGCTTACGAG         |
|                 | Antisense | TAAAGCTATCGTCACCCCA     |
| Gas6            | Sense     | CTGCCAAGATATCGATGAAT    |
|                 | Antisense | TTCTCCTTGGAGCTGTATGT    |
| G0s2            | Sense     | AAAGTGTGCAGGAGCTGAT     |
|                 | Antisense | CCAGCACGTATAGCTTCACT    |
| C/EBP $\alpha$  | Sense     | TGGACAAGAACAGCAACGAG    |
|                 | Antisense | TCACTGGTCAACTCCAGCAC    |
| PPAR $\gamma$ 2 | Sense     | TATGGGTGAAACTCTGGGAG    |
|                 | Antisense | GCTGGAGAAATCAACTGTGG    |
| aP2/422         | Sense     | TCTCCAGTGAAAACCTTCGAT   |
|                 | Antisense | TTACGCTGATGATCATGTTG    |
| L32             | Sense     | GCCTCTGGTGAAGCCCAAGATCG |
|                 | Antisense | CTCTGGGTTTCCGCCAGTTTCGC |
